# Supplementary material for: Influence of Organic Impurities on Fractional Crystallization of NaCl and Na2SO4 from High-Salinity Coal Chemical Wastewater: Thermodynamics and Nucleation Kinetics Analysis
Source: MDPI journal article supplement (doi:10.3390/molecules29091928), 2024-04-23
Supplement: s1 [file s1]

## **Supporting Information**

# **Influence of organic impurities on fractional crystallization of NaCl and Na<sub>2</sub>SO<sub>4</sub> from high-salinity coal chemical wastewater: thermodynamics and nucleation kinetics analysis**

## ***Molecules***

**Bo Shen, Bo Zhao, Hai Du, Yongsheng Ren, Jianwei Tang, Yong Liu, Quanxian Hua and Baoming Wang\***

*Corresponding author: Baoming Wang\**

*E-mail address: ziqiangdere@126.com.*

**Table S1.** Experimental and theoretical values of mole fraction of Na<sub>2</sub>SO<sub>4</sub>

| T /K                  | X <sup>exp</sup> /100 <sup>-2</sup> | Apelblat model                     |        | Van't Hoff model                   |        | polynomial equation                |        |
|-----------------------|-------------------------------------|------------------------------------|--------|------------------------------------|--------|------------------------------------|--------|
|                       |                                     | X <sup>cal</sup> /10 <sup>-2</sup> | RD /%  | X <sup>cal</sup> /10 <sup>-2</sup> | RD /%  | X <sup>cal</sup> /10 <sup>-2</sup> | RD /%  |
| 0% dimethoxymethane   |                                     |                                    |        |                                    |        |                                    |        |
| 278.15                | 0.827                               | 0.679                              | 17.903 | 0.789                              | 4.598  | 0.902                              | 9.132  |
| 283.15                | 1.255                               | 1.130                              | 9.904  | 1.273                              | 1.439  | 0.922                              | 26.520 |
| 288.15                | 2.007                               | 1.863                              | 7.161  | 2.020                              | 0.639  | 1.603                              | 20.147 |
| 293.15                | 2.979                               | 3.041                              | 2.083  | 3.156                              | 5.926  | 2.945                              | 1.162  |
| 298.15                | 4.596                               | 4.916                              | 6.965  | 4.857                              | 5.669  | 4.947                              | 7.637  |
| 303.15                | 8.034                               | 7.875                              | 1.977  | 7.370                              | 8.271  | 7.611                              | 5.265  |
| ARDP/%                |                                     |                                    | 7.666  |                                    | 4.424  |                                    | 11.644 |
| RMSD/10 <sup>-3</sup> |                                     |                                    | 1.777  |                                    | 3.007  |                                    | 3.118  |
| 1% dimethoxymethane   |                                     |                                    |        |                                    |        |                                    |        |
| 278.15                | 0.829                               | 0.572                              | 31.059 | 0.757                              | 8.664  | 1.073                              | 29.370 |
| 283.15                | 1.226                               | 0.989                              | 19.297 | 1.222                              | 0.293  | 0.929                              | 24.240 |
| 288.15                | 1.786                               | 1.692                              | 5.247  | 1.941                              | 8.655  | 1.528                              | 14.456 |
| 293.15                | 2.764                               | 2.862                              | 3.515  | 3.033                              | 9.697  | 2.870                              | 3.805  |
| 298.15                | 4.432                               | 4.786                              | 8.002  | 4.669                              | 5.345  | 4.954                              | 11.793 |
| 303.15                | 8.103                               | 7.922                              | 2.232  | 7.086                              | 12.550 | 7.782                              | 3.959  |
| ARDP/%                |                                     |                                    | 11.558 |                                    | 7.534  |                                    | 14.604 |
| RMSD/10 <sup>-3</sup> |                                     |                                    | 2.232  |                                    | 3.857  |                                    | 3.976  |
| 2% dimethoxymethane   |                                     |                                    |        |                                    |        |                                    |        |
| 278.15                | 0.783                               | 0.535                              | 31.696 | 0.719                              | 8.106  | 1.190                              | 52.033 |
| 283.15                | 1.185                               | 0.936                              | 20.978 | 1.170                              | 1.240  | 1.032                              | 12.891 |
| 288.15                | 1.730                               | 1.619                              | 6.401  | 1.871                              | 8.164  | 1.617                              | 6.488  |
| 293.15                | 2.656                               | 2.767                              | 4.185  | 2.944                              | 10.852 | 2.947                              | 10.951 |
| 298.15                | 4.330                               | 4.676                              | 7.998  | 4.563                              | 5.385  | 5.020                              | 15.934 |
| 303.15                | 7.993                               | 7.817                              | 2.204  | 6.970                              | 12.798 | 7.836                              | 1.964  |
| 278.15                | 0.783                               | 0.535                              | 31.696 | 0.719                              | 8.106  | 1.190                              | 52.033 |
| ARDP/%                |                                     |                                    | 12.243 |                                    | 7.757  |                                    | 16.710 |
| RMSD/10 <sup>-3</sup> |                                     |                                    | 2.230  |                                    | 3.902  |                                    | 4.589  |
| 3% dimethoxymethane   |                                     |                                    |        |                                    |        |                                    |        |
| 278.15                | 0.747                               | 0.602                              | 19.446 | 0.670                              | 10.341 | 0.913                              | 22.141 |
| 283.15                | 1.105                               | 1.021                              | 7.652  | 1.103                              | 0.213  | 0.698                              | 36.872 |
| 288.15                | 1.609                               | 1.712                              | 6.378  | 1.785                              | 10.907 | 1.254                              | 22.094 |
| 293.15                | 2.534                               | 2.840                              | 12.062 | 2.840                              | 12.082 | 2.580                              | 1.814  |
| 298.15                | 4.274                               | 4.664                              | 9.122  | 4.451                              | 4.147  | 4.678                              | 9.451  |
| 303.15                | 7.960                               | 7.583                              | 4.732  | 6.872                              | 13.665 | 7.546                              | 5.199  |
| ARDP/%                |                                     |                                    | 9.899  |                                    | 8.559  |                                    | 16.262 |
| RMSD/10 <sup>-3</sup> |                                     |                                    | 2.665  |                                    | 3.075  |                                    | 4.239  |

**Table S2.** Van't Hoff equation parameters of  $\text{Na}_2\text{SO}_4$  at different concentrations of dimethoxymethane

| dimethoxymethane                                             | 0%     | 1%     | 2%     | 3%     |
|--------------------------------------------------------------|--------|--------|--------|--------|
| $\Delta S_d(\text{J}\cdot\text{mol}^{-1}\cdot\text{K}^{-1})$ | 185.04 | 184.84 | 187.92 | 193.07 |
| $\Delta H_d(\text{kJ}\cdot\text{mol}^{-1})$                  | 62.67  | 62.71  | 63.68  | 65.28  |
| $R^2$                                                        | 0.9942 | 0.9843 | 0.9844 | 0.9809 |

**Table S3** The  $\gamma$  for  $\text{Na}_2\text{SO}_4$  in water at different temperatures and concentrations of dimethoxymethane

|                         | (mJ·m <sup>-2</sup> ) |       |       |       |
|-------------------------|-----------------------|-------|-------|-------|
| w(dimethoxymethane) (%) | 0                     | 1     | 2     | 3     |
| 278.15 K                | 7.23                  | 10.28 | 11.49 | 12.46 |
| 283.15 K                | 9.82                  | 13.39 | 15.13 | 14.44 |
| 288.15 K                | 9.95                  | 11.53 | 12.78 | 15.17 |
| 293.15 K                | 12.18                 | 12.68 | 15.14 | 17.04 |
| 298.15 K                | 12.47                 | 14.79 | 16.34 | 18.84 |
| 303.15 K                | 17.04                 | 16.99 | 20.22 | 21.51 |

**Table S4** The  $A$  for  $\text{Na}_2\text{SO}_4$  in water at different temperatures and concentrations of dimethoxymethane

|                        | (×10 <sup>30</sup> m <sup>-3</sup> ·h <sup>-1</sup> ) |       |       |       |
|------------------------|-------------------------------------------------------|-------|-------|-------|
| w(dimethoxymethane)(%) | 0                                                     | 1     | 2     | 3     |
| 278.15 K               | 3.91                                                  | 1.84  | 2.84  | 1.92  |
| 283.15 K               | 3.84                                                  | 2.53  | 2.58  | 2.63  |
| 288.15 K               | 1.82                                                  | 1.36  | 1.55  | 1.42  |
| 293.15 K               | 1.56                                                  | 3.55  | 9.87  | 3.69  |
| 298.15 K               | 10.37                                                 | 3.49  | 126.1 | 47.71 |
| 303.15 K               | 3.09                                                  | 30.32 | 93.30 | 31.58 |

**Table S5** Phase equilibrium solubility data of the pseudo-ternary system (NaCl-Na<sub>2</sub>SO<sub>4</sub>-H<sub>2</sub>O) in simulated wastewater

| T/K    | No. | Composition in liquid phase |                                       | Solution density<br>$\rho/\text{g}\cdot\text{cm}^{-3}$ |
|--------|-----|-----------------------------|---------------------------------------|--------------------------------------------------------|
|        |     | 100 $\omega_{\text{NaCl}}$  | 100 $\omega_{\text{Na}_2\text{SO}_4}$ |                                                        |
| 333.15 | 1   | 27.09                       | 0                                     | 1.236                                                  |
|        | 2   | 25.37                       | 2.74                                  | 1.246                                                  |
|        | 3   | 24.47                       | 4.85                                  | 1.259                                                  |
|        | 4   | 20.30                       | 7.41                                  | 1.270                                                  |
|        | 5   | 17.17                       | 10.06                                 | 1.250                                                  |
|        | 6   | 13.82                       | 12.68                                 | 1.275                                                  |
|        | 7   | 10.22                       | 16.73                                 | 1.285                                                  |
|        | 8   | 6.75                        | 21.11                                 | 1.295                                                  |
|        | 9   | 3.29                        | 26.26                                 | 1.297                                                  |
|        | 10  | 0                           | 30.67                                 | 1.303                                                  |
| 323.15 | 1   | 26.83                       | 0                                     | 1.228                                                  |
|        | 2   | 25.21                       | 2.98                                  | 1.265                                                  |
|        | 3   | 24.04                       | 5.11                                  | 1.277                                                  |
|        | 4   | 20.26                       | 8.03                                  | 1.280                                                  |
|        | 5   | 16.97                       | 10.73                                 | 1.273                                                  |
|        | 6   | 13.63                       | 13.95                                 | 1.276                                                  |
|        | 7   | 10.52                       | 17.72                                 | 1.285                                                  |
|        | 8   | 6.84                        | 22.17                                 | 1.305                                                  |
|        | 9   | 3.57                        | 26.63                                 | 1.309                                                  |
|        | 10  | 0                           | 31.10                                 | 1.314                                                  |
| 313.15 | 1   | 26.67                       | 0                                     | 1.220                                                  |
|        | 2   | 24.95                       | 2.94                                  | 1.215                                                  |
|        | 3   | 23.59                       | 5.63                                  | 1.227                                                  |
|        | 4   | 20.26                       | 7.84                                  | 1.256                                                  |
|        | 5   | 17.06                       | 10.54                                 | 1.268                                                  |
|        | 6   | 13.54                       | 14.04                                 | 1.259                                                  |
|        | 7   | 10.08                       | 18.32                                 | 1.278                                                  |
|        | 8   | 6.62                        | 22.46                                 | 1.299                                                  |
|        | 9   | 3.29                        | 27.17                                 | 1.298                                                  |
|        | 10  | 0                           | 31.77                                 | 1.318                                                  |
| 303.15 | 1   | 26.50                       | 0                                     | 1.205                                                  |
|        | 2   | 24.81                       | 3.10                                  | 1.212                                                  |
|        | 3   | 23.11                       | 6.27                                  | 1.232                                                  |
|        | 4   | 20.05                       | 8.93                                  | 1.244                                                  |
|        | 5   | 16.76                       | 11.93                                 | 1.251                                                  |
|        | 6   | 13.84                       | 15.31                                 | 1.263                                                  |
|        | 7   | 10.48                       | 18.92                                 | 1.275                                                  |
|        | 8   | 7.17                        | 21.44                                 | 1.287                                                  |
|        | 9   | 4.46                        | 26.59                                 | 1.314                                                  |
|        | 10  | 0                           | 32.76                                 | 1.319                                                  |

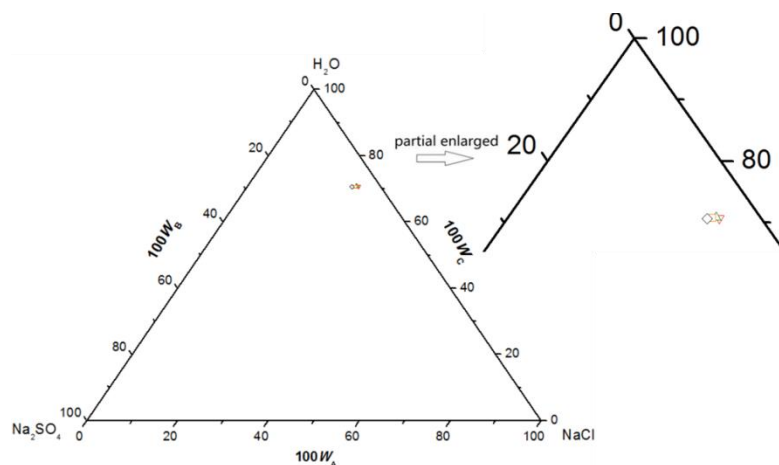

**Figure S1** The co-saturated points of the pseudo-ternary system (NaCl-Na<sub>2</sub>SO<sub>4</sub>-H<sub>2</sub>O) of simulated wastewater at T = 303.15 K (black point), 313.15 K (orange point), 323.15K (green point) and 333.15 K (red point). ( $W_A$ ,  $W_B$  and  $W_C$  are the mass fractions of NaCl, Na<sub>2</sub>SO<sub>4</sub> and H<sub>2</sub>O, respectively).

Text S1

### **Determination of sulfate ion**

The gravimetric method was applied to the quantification of sulfate ion based on the national standard of China (GB/T 13025.8-2012), which specifies methods for the determination of sulfate in salt products and salt chemical products. After being adjusted to acidity with hydrochloric acid, excessive barium chloride solution was added to the test sample to completely precipitate the sulfate ions. The barium sulfate precipitation was filtered, washed, dried and weighed. Weigh the precipitation every 30 minutes until the difference between two weightings is less than 0.0002g. The  $\text{SO}_4^{2-}$  content in the sample was calculated based on the precipitation mass with the following equation:

$$\omega = \frac{(m_1 - m_2) \times 0.4116}{m} \times 100\%$$

Where  $\omega$  represents the mass fraction of sulfate ion;  $m_1$  is the mass of barium sulfate and glass crucible, g;  $m_2$  is the mass of glass crucible, g; 0.4116 is the conversion coefficient from barium sulfate to sulfate ion;  $m$  is the mass of the sample taken, g.

### **Determination of chloride ion**

Similarly, the argentometric method was adopted for the determination of chloride ion according to the national standard of China (GB/T 13025.5-2012), which is suitable for the determination of chloride ion in salt products, salt chemical products and their raw materials. The sample solution was adjusted to neutral, titrated with silver nitrate standard titration solution, with potassium chromate as an indicator. When the solution appeared orange red without fading for 30 seconds, it was recorded as the titration end point. The content of chloride ion was calculated based on the volume of silver nitrate solution consumed with the following equation:

$$\omega = \frac{(V_1 - V_0) \times c(\text{AgNO}_3) \times 35.453}{m \times 1000} \times 100\%$$

Where  $\omega$  represents the mass fraction of chloride ion;  $V_1$  is the consumed volume of silver nitrate standard solution by the test sample, mL;  $V_0$  is the consumed volume of silver nitrate standard solution in blank test, mL;  $c(\text{AgNO}_3)$  is the concentration of silver nitrate standard solution, mol/L; 35.453 is the molar mass of chloride ion, g/mol;  $m$  is the mass of the sample taken, g; 1000 is the unit conversion coefficient.
